# Supplementary material
Source: publisher site journal article supplement (https://www.dovepress.com/article/464258)
Supplement: Supplementary file 1 [file get_supplementary_file.php]

# **Yemeni Physicians' attitudes and perceived barriers toward ward-based clinical pharmacist in hospital settings**

**Dear Physician.**

Clinical pharmacy is the area of pharmacy concerned with the science and practice of rational medication use. Clinical pharmacy is emerging discipline in Yemen and the area of clinical pharmacy poorly covered by researchers in Yemen.

We are currently conducting a research investigating the attitudes, we also want to determine the barriers that hinder the interaction between pharmacists and physicians

Kindly fill in the following questionnaire accurately and faithfully manner and return it back to the researchers. Your participation is highly appreciated.

Your participation will be anonymous.

**We warmly thank you dear to your participation in our questionnaire.**

**The Research Team,**

**Part one**

**Gender**

Male  Female

**Age. Ye.**

20 - 35.  
 36 - 50.  
 50 - 65.  
 > 65.

**Current Position.**

Consultant  
 Specialist  
 General Practitioner GP  
 Resident

**Years of experience in practice.**

0 - 2  3 - 5  6 - 9  10 - 15  > 15

**Current area of practice.**

Internal Medicine  Pediatrics  
 Obstetric & Gynecology  Surgery  
 Neurology  Cardiology  
 Critical Care Units ( ICU, CCU, NICU, PICU)  Others

**Q1- Have you had experience working with a clinical pharmacist as part of your medical training?**

Never  Rarely  Often  Very often  Always

**Q2- How well has the clinical pharmacist met your needs in terms of patient care?**

Very adequately  Adequately  Acceptably  Poorly  Not at all

**Q3- Which of the following do you think is most important in maximizing the clinical pharmacist's contribution to patient care? Tick all that apply**

- Attend medical rounds.
- Being available for consultation.
- Patient education       Order Review       Staff education.
- Attend clinic

**Q4- Type of hospital :**     Public       Privet

**Part Two**

**For these statements please select the answer that best reflects how much you do agree with the statement regarding your attitudes of a clinical pharmacist working with physicians.**

| Statement                                                                                                | Strongly agree | Agree | Neutral | Disagree | Strongly disagree |
|----------------------------------------------------------------------------------------------------------|----------------|-------|---------|----------|-------------------|
| Clinical pharmacist participation in medical ward round is desirable.                                    |                |       |         |          |                   |
| Clinical pharmacist can play important role in patient education and counseling.                         |                |       |         |          |                   |
| Clinical pharmacist can monitor patient response to drug therapy from toxicity/side effects perspective. |                |       |         |          |                   |

|                                                                                                                                               |  |  |  |  |  |
|-----------------------------------------------------------------------------------------------------------------------------------------------|--|--|--|--|--|
| <b>Clinical pharmacist can monitor patient response to drug therapy from effectiveness perspective.</b>                                       |  |  |  |  |  |
| <b>Clinical pharmacist can involve in drug selection (drug, dosage form) based on patient and drug factors.</b>                               |  |  |  |  |  |
| <b>Clinical pharmacist can provide drug information to health care professionals such as compatibility, stability, storage, availability.</b> |  |  |  |  |  |
| <b>Clinical pharmacist can detect and prevent medication use errors.</b>                                                                      |  |  |  |  |  |
| <b>Clinical pharmacy service enhances patients' appreciation and satisfaction.</b>                                                            |  |  |  |  |  |
| <b>Clinical pharmacist should take patients medication history at admission.</b>                                                              |  |  |  |  |  |
| <b>Clinical pharmacist should have access to patients chart and have a place to document their service.</b>                                   |  |  |  |  |  |
| <b>Clinical pharmacist should analyses patient treatment and suggest changes of therapy when necessary.</b>                                   |  |  |  |  |  |
| <b>Clinical pharmacist should care about drug products and leave patient care to Doctors, Health Officers and nurses.</b>                     |  |  |  |  |  |
| <b>The current setup (infrastructure and environments of your hospitals) appropriate for the provisions of clinical pharmacy service.</b>     |  |  |  |  |  |
| <b>Clinical pharmacy service initiation is desirable in Yemen health care system.</b>                                                         |  |  |  |  |  |
| <b>Clinical pharmacist can improve overall patient outcome /quality of patient care.</b>                                                      |  |  |  |  |  |

### Part Three

For these questions please select the answer that best reflects how much you do agree with the statement regarding barriers that can hinder a clinical pharmacist's role with physicians.

| Statement                                                                                                   | Strongly agree | Agree | Neutral | Disagree | Strongly disagree |
|-------------------------------------------------------------------------------------------------------------|----------------|-------|---------|----------|-------------------|
| The specific responsibilities of a clinical pharmacist are not clearly defined.                             |                |       |         |          |                   |
| There are not enough number of clinical pharmacists staff in the health center that we are working in.      |                |       |         |          |                   |
| Administration does not supportively enough clinical pharmacist services.                                   |                |       |         |          |                   |
| The hospital that we work in is inconvenient.                                                               |                |       |         |          |                   |
| Clinical pharmacist does not have good knowledge on disease management.                                     |                |       |         |          |                   |
| Clinical pharmacist does not have good knowledge on drug related issues.                                    |                |       |         |          |                   |
| Clinical pharmacist does not have enough confidence to interact with the health care team.                  |                |       |         |          |                   |
| Clinical pharmacist is not interested to provide clinical pharmacy services.                                |                |       |         |          |                   |
| Clinical pharmacists have inadequate communication skills needed for interaction with physician             |                |       |         |          |                   |
| Clinical pharmacist recommendations are not properly documented.                                            |                |       |         |          |                   |
| There is no continuity in the services provided by the clinical pharmacist due to other non-clinical roles. |                |       |         |          |                   |
| Physicians are unaware of the benefits of having a clinical pharmacist on their team.                       |                |       |         |          |                   |
| Physicians are unable to judge the knowledge and level of                                                   |                |       |         |          |                   |

|                                                                                                             |  |  |  |  |  |
|-------------------------------------------------------------------------------------------------------------|--|--|--|--|--|
| <b>skills of the clinical pharmacist.</b>                                                                   |  |  |  |  |  |
| <b>Physicians have low trust in the clinical pharmacist's abilities.</b>                                    |  |  |  |  |  |
| <b>Physicians have inadequate communication skills needed for interaction with the clinical pharmacist.</b> |  |  |  |  |  |
| <b>Physicians do not support adequately the clinical pharmacist services.</b>                               |  |  |  |  |  |
| <b>Physicians have no prior experience of working with a clinical pharmacist.</b>                           |  |  |  |  |  |
| <b>Physicians believe that clinical pharmacists cannot be clinicians.</b>                                   |  |  |  |  |  |
